# Supplementary material
Source: PubMed Central journal article supplement (PMC7180726)
Supplement: jamacardiol-5-825-s001.pdf [file jamacardiol-5-825-s001.pdf]

## Supplementary Online Content

Li J, Wang X, Chen J, Zhang H, Deng A. Association of renin-angiotensin system inhibitors with severity or risk of death in patients with hypertension hospitalized for coronavirus disease 2019 (COVID-19) infection in Wuhan, China. *JAMA Cardiol*. Published online April 23, 2020. doi:10.1001/jamacardio.2020.1624

**eTable.** Characteristics of the hypertension group compared with the non-hypertension group in patients with COVID-19

This supplementary material has been provided by the authors to give readers additional information about their work.

**eTable. Characteristics of the hypertension group compared with the non-hypertension group in patients with COVID-19**

|                                                   | Patients infected COVID-19 |                      |                          |         |
|---------------------------------------------------|----------------------------|----------------------|--------------------------|---------|
|                                                   | Total (n=1178)             | Hypertension (n=362) | non-Hypertension (n=816) | P       |
| <b>Age, median (IQR), years</b>                   | 55.5 (38.0-67.0)           | 66.0 (59.0-73.0)     | 46.0 (34.0-61.0)         | < 0.001 |
| <b>Distribution. (%)</b>                          |                            |                      |                          |         |
| < 40                                              | 330 (28.0)                 | 9 (2.5)              | 321 (39.3)               | < 0.001 |
| 40-60                                             | 382 (32.4)                 | 94 (26.0)            | 288 (35.3)               |         |
| > 60                                              | 466 (39.6)                 | 259 (71.5)           | 207 (25.4)               |         |
| <b>Gender, %</b>                                  |                            |                      |                          |         |
| Female                                            | 633 (53.7)                 | 173 (47.8)           | 460 (56.4)               | 0.006   |
| Male                                              | 545 (46.3)                 | 189 (52.2)           | 356 (43.6)               |         |
| <b>Chronic disease, %</b>                         |                            |                      |                          |         |
| Cerebrovascular disease                           | 95 (8.1)                   | 68 (18.8)            | 27 (3.3)                 | < 0.001 |
| Coronary heart disease                            | 103 (8.7)                  | 62 (17.1)            | 41 (5.0)                 | < 0.001 |
| Heart failure                                     | 21 (1.8)                   | 10 (2.8)             | 11 (1.3)                 | 0.091   |
| Diabetes                                          | 203 (17.2)                 | 127 (35.1)           | 76 (9.3)                 | < 0.001 |
| Digestive disorder                                | 167 (14.2)                 | 78 (21.5)            | 89 (10.9)                | < 0.001 |
| Respiratory disease                               | 54 (4.6)                   | 18 (5.0)             | 36 (4.4)                 | 0.671   |
| Neurological disease                              | 76 (6.5)                   | 38 (10.5)            | 38 (4.7)                 | < 0.001 |
| Solid tumor                                       | 32 (2.7)                   | 11 (3.0)             | 21 (2.6)                 | 0.650   |
| Chronic renal disease                             | 44 (3.7)                   | 35 (9.7)             | 9 (1.1)                  | < 0.001 |
| <b>Blood biochemical parameters, Median (IQR)</b> |                            |                      |                          |         |
| Leukocytes (3.5-9.5) 10 <sup>9</sup> / L          | 5.2 (4.0-6.7)              | 5.7 (4.5-7.3)        | 5.0 (3.8-6.4)            | 0.009   |
| Neutrophils (1.8-6.3) 10 <sup>9</sup> / L         | 3.3 (2.4-4.7)              | 3.8 (2.9-5.5)        | 3.1 (2.2-4.3)            | < 0.001 |
| Lymphocytes (1.1-3.2) 10 <sup>9</sup> / L         | 1.2 (0.8-1.6)              | 1.0 (0.7-1.4)        | 1.2 (0.9-1.7)            | 0.002   |
| Platelets (125-350) 10 <sup>9</sup> / L           | 188.0 (148.8-242.0)        | 186.5 (143.0-246.3)  | 190.5 (150.0-240.0)      | 0.554   |
| Hemoglobin (130-175 g/ L)                         | 128.0 (118.0-139.0)        | 126.0 (113.0-138.0)  | 129.0 (119.0-140.0)      | 0.009   |
| Monocytes (0.1-0.6) 10 <sup>9</sup> / L           | 0.4 (0.3-0.5)              | 0.4 (0.3-0.5)        | 0.5 (0.3-0.5)            | 0.185   |
| Activated partial thromboplastin time (20-40) s   | 27.3 (24.3-31.0)           | 27.7 (24.6-32.0)     | 27.2 (24.2-30.6)         | 0.001   |
| Fibrinogen (2-4) g/ L                             | 2.6 (2.2-3.3)              | 3.0 (2.5-3.6)        | 2.5 (2.1-3.1)            | < 0.001 |
| Prothrombin time (9-13) s                         | 11.4 (10.8-12.0)           | 11.5 (10.9-12.2)     | 11.3 (10.7-11.9)         | < 0.001 |
| International Normalized Ratio (0.7-1.3)          | 1.0 (0.9-1.0)              | 1.0 (0.9-1.1)        | 1.0 (0.9-1.0)            | < 0.001 |
| D-dimer (0-1) µg/ mL                              | 0.5 (0.2-1.2)              | 0.7 (0.4-2.2)        | 0.4 (0.2-0.9)            | 0.005   |
| Albumin (40-55) g/ L                              | 39.4 (35.4-                | 37.0 (33.6-40.5)     | 40.4 (36.7-43.5)         | < 0.001 |

|                                               |                     |                     |                     |         |
|-----------------------------------------------|---------------------|---------------------|---------------------|---------|
|                                               | 42.9)               |                     |                     |         |
| Globulin (20-40) g/ L                         | 27.4 (24.3-31.5)    | 27.8 (24.9-32.0)    | 27.1 (23.8-31.3)    | 0.202   |
| Albumin-to-globulin ratio (1.2-2.4)           | 1.4 (1.2-1.7)       | 1.3 (1.1-1.5)       | 1.5 (1.2-1.7)       | < 0.001 |
| Alanine aminotransferase (9-50) U/ L          | 19.5 (13.1-33.3)    | 22.7 (14.1-37.2)    | 18.5 (12.6-30.9)    | 0.810   |
| Aspartate aminotransferase (15-40) U/ L       | 21.0 (16.0-30.5)    | 24.9 (18.2-36.4)    | 19.6 (15.2-28.0)    | 0.001   |
| Total bilirubin (2-20.4) $\mu$ mol/ L         | 9.2 (6.7-13.0)      | 9.4 (6.8-13.6)      | 9.1 (6.6-12.8)      | 0.886   |
| Serum urea (1.7-8.3) mmol/ L                  | 4.1 (3.2-5.5)       | 5.1 (3.8-6.5)       | 3.9 (3.1-4.8)       | < 0.001 |
| Serum creatinine (57-111) $\mu$ mol/ L        | 64.7 (51.5-79.1)    | 70.6 (55.3-92.6)    | 61.5 (50.4-74.7)    | < 0.001 |
| Alkaline phosphatase (40-150) U/ L            | 52.0 (42.0-67.0)    | 57.0 (44.0-71.0)    | 51.0 (42.0-66.0)    | 0.099   |
| Creatine kinase (38-174) U/ L                 | 63.0 (35.0-115.0)   | 79.5 (45.0-147.7)   | 57.5 (31.2-98.5)    | 0.199   |
| Lactate dehydrogenase (80-285) U/ L           | 165.0 (128.0-216.3) | 195.5 (151.8-265.5) | 154.0 (120.3-201.0) | < 0.001 |
| Myoglobin (14.3-105.5) ng/ mL                 | 25.5 (14.9-50.3)    | 35.7 (18.5-83.9)    | 21.6 (14.4-34.2)    | 0.605   |
| Troponin (< 0.03) $\mu$ g/ L                  | 0.003 (0.000-0.013) | 0.008 (0.002-0.030) | 0.001 (0.000-0.007) | 0.925   |
| Procalcitonin (< 0.04) ng/ mL                 | 0.05 (0.03-0.08)    | 0.06 (0.04-0.13)    | 0.04 (0.03-0.06)    | 0.053   |
| Interleukin 6 (< 7) pg/ mL                    | 4.5 (2.0-15.0)      | 8.4 (3.8-26.9)      | 3.5 (1.8-9.7)       | 0.105   |
| C-reactive protein (0-0.5) mg/ dL             | 0.8 (0.1-3.6)       | 2.5 (0.4-5.4)       | 0.5 (0.1-2.8)       | < 0.001 |
| <b>Acute respiratory distress syndrome, %</b> | 172 (14.6)          | 94 (26.0)           | 78 (9.6)            | < 0.001 |
| <b>Severe, %</b>                              | 386 (32.8)          | 173 (47.8)          | 213 (26.1)          | < 0.001 |
| <b>Non-survivor, %</b>                        | 130 (11.0)          | 77 (21.3)           | 53 (6.5)            | < 0.001 |
| <b>Hospital stays, median (IQR), days</b>     | 16.0 (10.0-24.0)    | 19.0 (12.0-27.0)    | 15.0 (10.0-22.0)    | < 0.001 |
